# Supplementary material for: Lanthanide complexes of chiral 3 + 3 macrocycles derived from (1R,2R)-1,2-diaminocyclohexane and 2,6-diformyl-4-methylphenol
Source: Royal Society of Chemistry journal article supplement (doi:10.1039/b502863a), 2005-10-27
Supplement: b502863a.pdf [file b502863a.pdf]

### Assignment of NMR lines of the Lu(III) complex.

The analysis starts with the easily assigned signals of methyl groups **a** and **r** (Supplementary Fig. 1), that integrate to 3H and 6H, respectively, while all other signals integrate to 2H (see Scheme 1 for the labelling). The TOCSY spectrum (Fig. 3) allows to find the group of 10 correlated signals and group of 5 correlated signals, that have to correspond to two sets of cyclohexane protons: **e+f+g+h+i+j+k+l+m+n** and **v+w+x+y+z**, respectively. HMQC spectra (Supplementary Fig. 2) identify the <sup>1</sup>H NMR signals of pairs of geminal protons because each signal of given pair is correlated to the same <sup>13</sup>C NMR signal. These spectra also allow to find signals of cyclohexane *CHNH* protons that do not have geminal partner, i.e. signal **v** from the group of five TOCSY correlated signals and two signals **e+n** from the group of ten TOCSY correlated signals. Signal **a** is NOESY (Supplementary Fig. 1), ROESY (Supplementary Fig. 3) and COSY (Supplementary Fig. 4) correlated to signal of aromatic proton **b**, this in turn is ROESY and NOESY (Supplementary Fig. 1) correlated to both signals of the geminal pair **c+d**. Signal **b** exhibit one additional ROESY correlation; inspection of model structure of the complex (as well as X-ray crystal structure of Eu(III) complex, *vide infra*) points to close contact between aromatic proton **b** and equatorial proton **f**. Thus the above ROESY correlations identifies signal of proton **f**, while HMQC spectrum identifies its geminal partner i.e. axial proton **g**. Signal **g** exhibit COSY correlation (Supplementary Fig. 4) to one of the signals from the above assigned group of signals **e+n** (that is signal **e**). Signal **n** exhibit COSY correlation to a signal, that on the basis of Karplus relation has to be that of axial proton **m**, and the HMQC-found geminal partner of **m** has to be equatorial proton **l**. In the same way signal **v** is strongly COSY correlated to signal of axial proton **x**, and the HMQC-found geminal partner of **x** is equatorial proton **w**. Similarly, on the basis of Karplus relation that predicts large coupling constants between respective axial protons, signal that is COSY correlated to **x** correspond to axial proton **y**, while the geminal partner of **y** correspond to proton **z**. The remaining COSY crosspeaks corresponding to pairs of axial cyclohexane protons **m, k** and **g, i** are more difficult to observe, since they are close to the diagonal and the signals **k** and **i** overlap. Fortunately, the COSY crosspeaks of the corresponding pairs of equatorial signals **f, h** and **j, l** are resolved. The overlapped signals of

equatorial protons **j** and **h** are, as expected, strongly COSY correlated to the overlapped signals of axial protons **i** and **k**. The overlapping of these signals is confirmed by integration.

The methyl signal **r** is NOESY (Supplementary Fig. 1) and COSY correlated to the signals of two aromatic protons **q+s**. These in turn are ROESY correlated to four signals of methylene bridges, so the group of signals **o+p+t+u** can be identified. The ROESY spectrum also shows crosspeaks between two signals of the latter group and the already assigned signal of proton **v**. The stronger of these two crosspeaks identifies equatorial proton **t**, while the weaker the axial proton **u**, since the distance **v-t** is shorter than **v-u**. Additionally ROESY crosspeak corresponding to the close equatorial protons **w** and **t** is observed. Both signals **u** and **t** are ROESY correlated to signal of proton **s**, thus the remaining signal of aromatic proton has to correspond to signal **q**. Signal **q** is ROESY correlated to signals of the methylene protons **o** and **p**, that are in turn correlated to the already assigned signal of proton **l**. In this way chemical shifts of all protons can be assigned:  $\delta$  (ppm) 0.86 **x**, 0.96 **y**, 1.18 **i**, **k**, 1.22 **g**, 1.30 **m**, 1.65 **z**, 1.79 **h**, **j**, 2.00 **v**, 2.21 **r**, 2.22 **a**, 2.33 **w,l**, 2.40 **f**, 2.87 **e**, **n**, 3.83 **t**, 3.90 **d**, 4.05 **p**, 4.23 **u**, 4.54 **o**, 4.57 **c**, 7.00 **q**, 7.08 **s**, 7.15 **b**. The above assignment is additionally confirmed by the observation of COSY correlation between aromatic signals **s** and **q**, ROESY correlation between signals **q**, **s** and **w**, as well as COSY and NOESY correlations between the signals of geminal protons and the remaining COSY correlations of the cyclohexane signals. The  $^1\text{H}$  NMR assignment and HMQC spectra allow to identify the  $^{13}\text{C}$  NMR signals of the respective carbon atoms:  $\delta$  (ppm) 20.06 **a**, 20.25 **r**, 23.62 **h**, 23.76 **j**, 24.88 **y**, 27.81 **f**, 28.52 **l**, 30.45 **w**, 46.01 **c**, 46.15 **t**, 49.18 **o**, 55.72 **e**, 56.87 **n**, 57.84 **v**, 131.91 **q**, 133.22 **s**, 135.43 **b**.

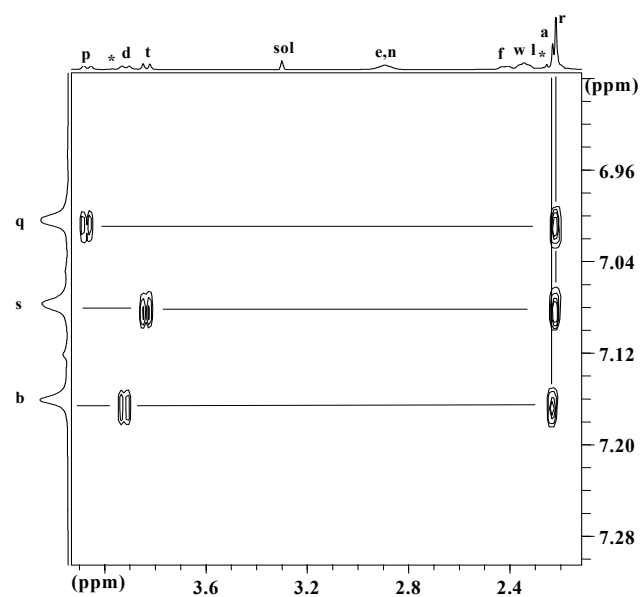

**Supplementary Fig. 1** NOESY spectrum (fragment) of solution containing H<sub>3</sub>L and 1.9 equivalents of LuCl<sub>3</sub>•6H<sub>2</sub>O (298 K, D<sub>2</sub>O/CD<sub>3</sub>OD 2:1 v/v), \* denotes signals of uncomplexed macrocycle.

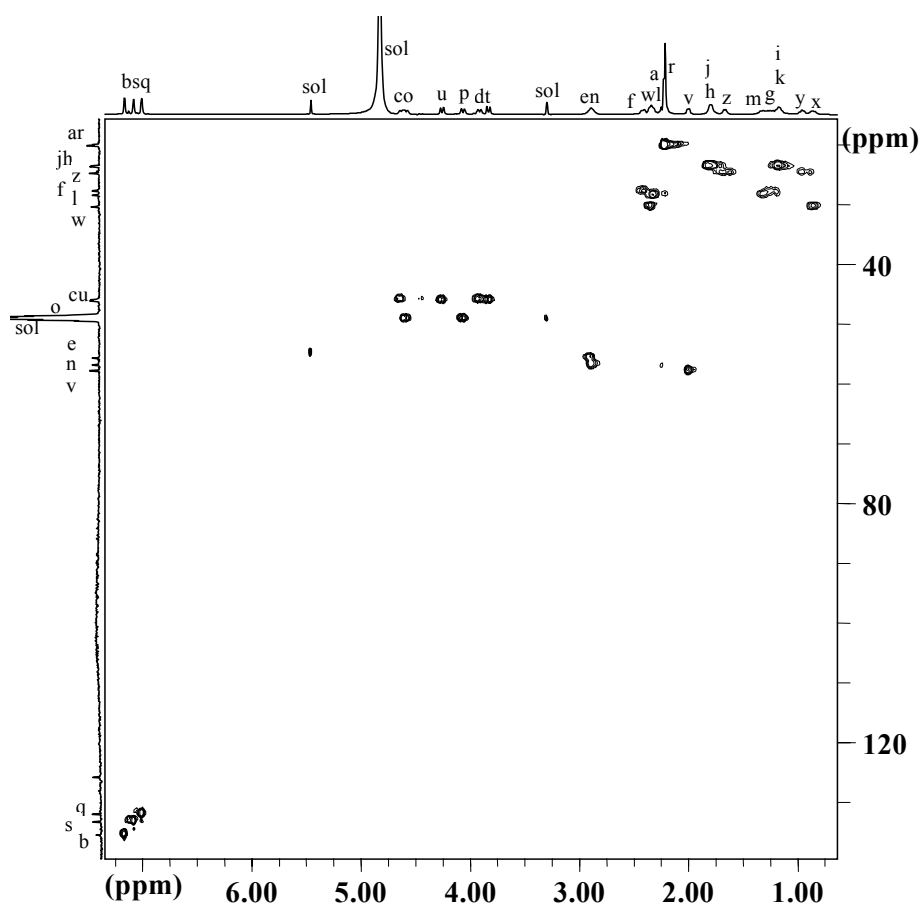

**Supplementary Fig. 2** HMQC spectrum of solution containing H<sub>3</sub>L and 1.9 equivalents of LuCl<sub>3</sub>•6H<sub>2</sub>O (298 K, D<sub>2</sub>O/CD<sub>3</sub>OD 2:1 v/v), sol denotes residual solvent and CH<sub>2</sub>Cl<sub>2</sub> signals.

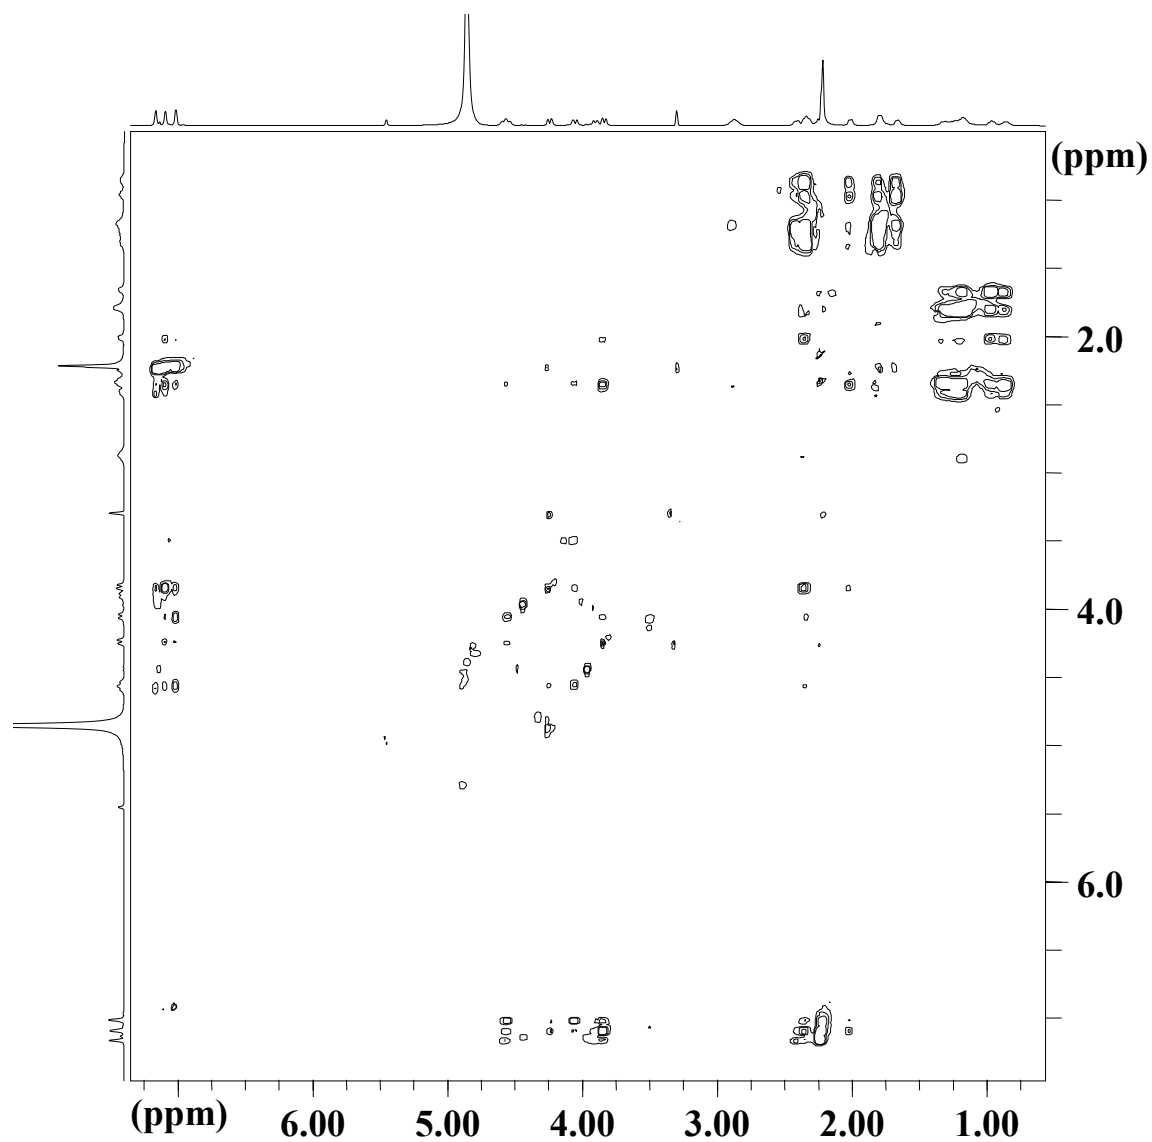

Supplementary Figure 3. ROESY spectrum (negative) of solution containing H<sub>3</sub>L and 1.9 equivalents of LuCl<sub>3</sub>·6H<sub>2</sub>O (298 K, D<sub>2</sub>O/CD<sub>3</sub>OD 2:1 v/v).

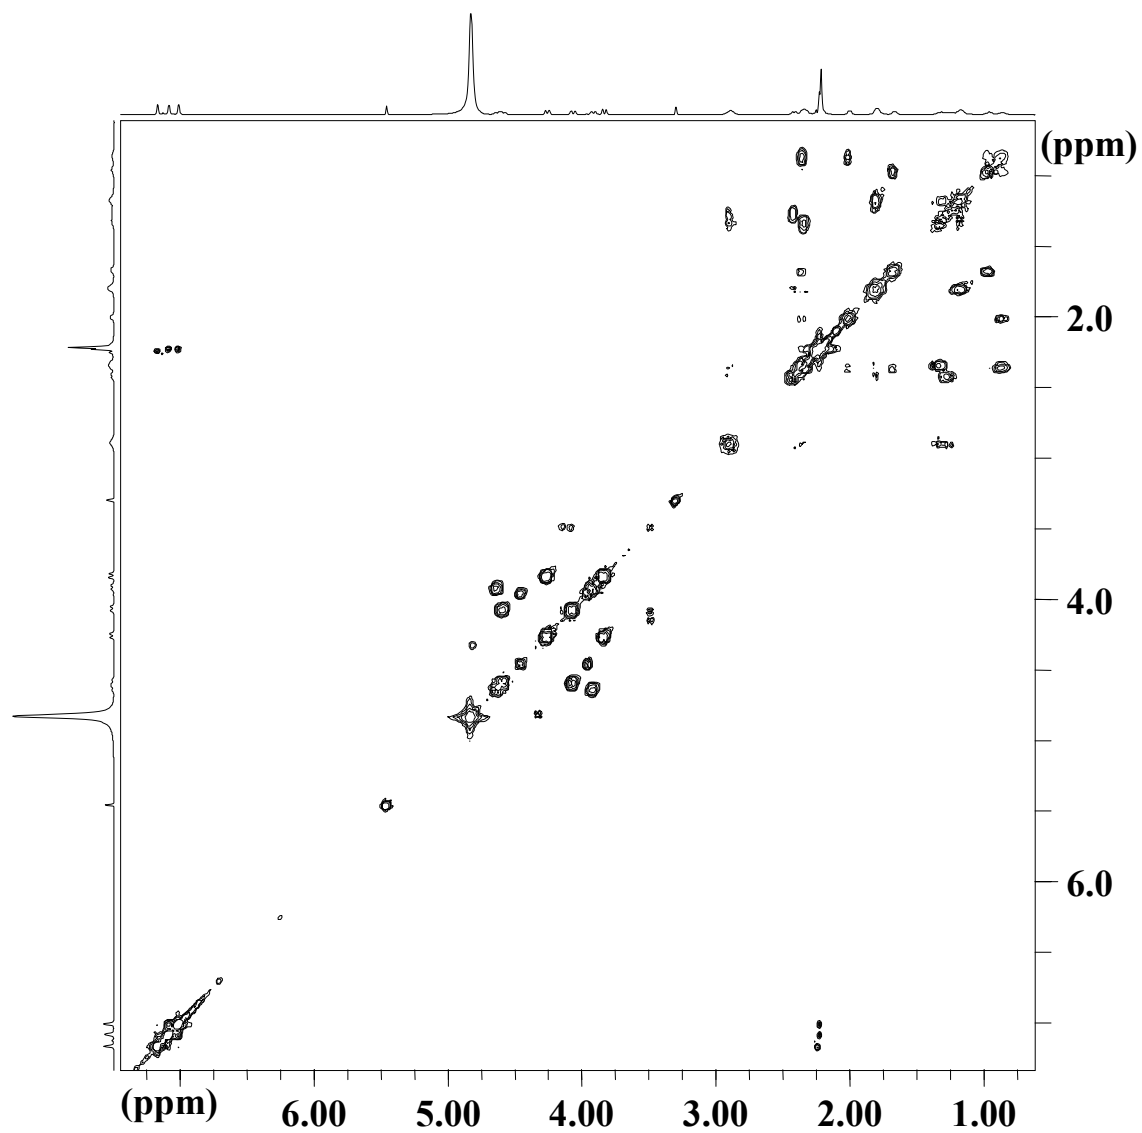

Supplementary Figure 4. COSY spectrum of solution containing H<sub>3</sub>L and 1.9 equivalents of LuCl<sub>3</sub>·6H<sub>2</sub>O (298 K, D<sub>2</sub>O/CD<sub>3</sub>OD 2:1 v/v).

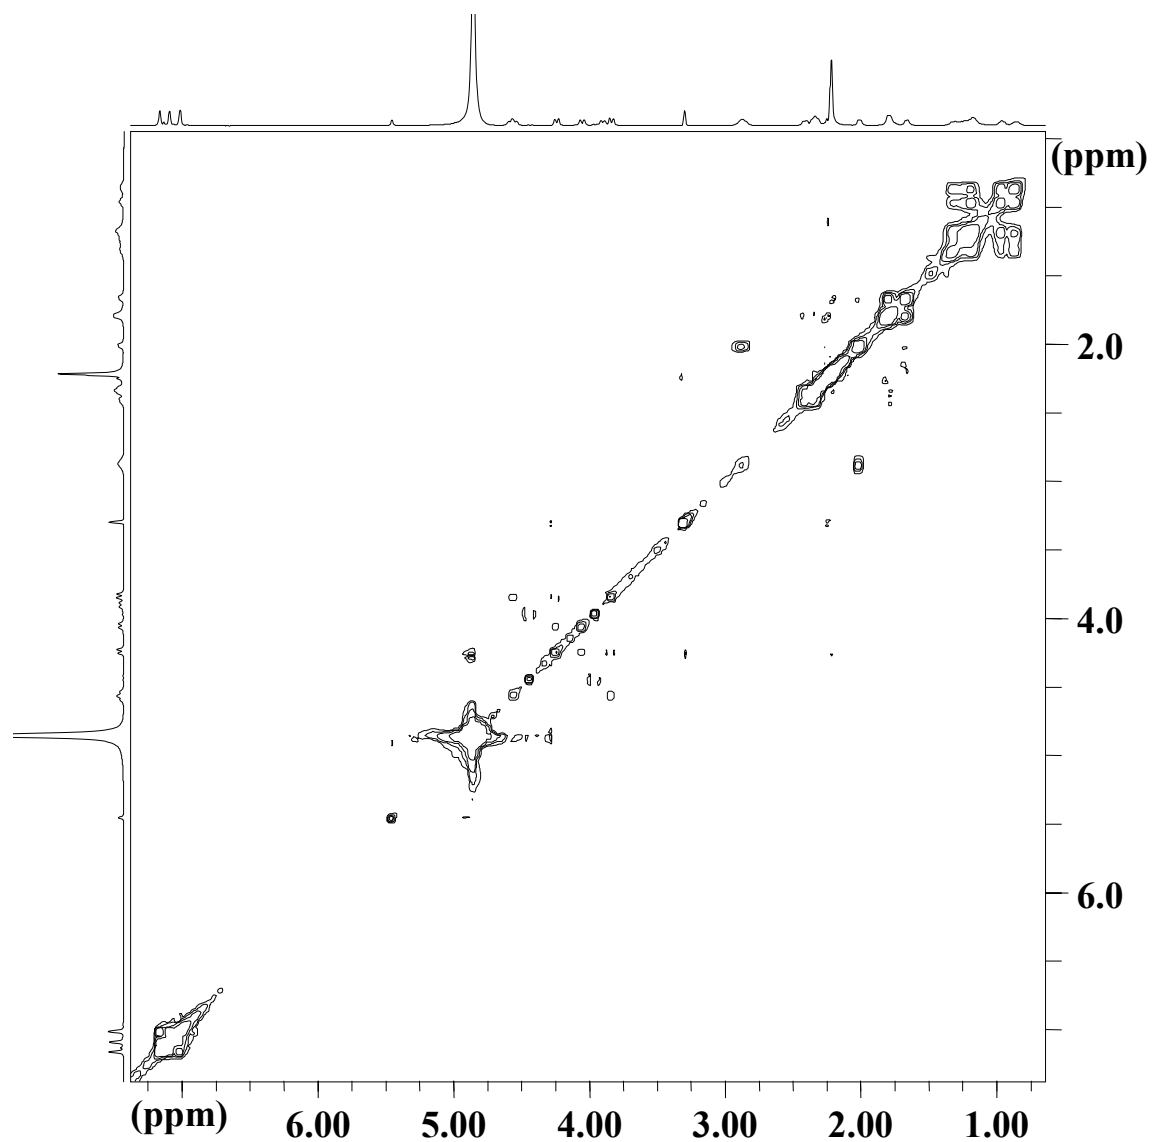

Supplementary Figure 5. ROESY spectrum (positive) of solution containing  $\text{H}_3\text{L}$  and 1.9 equivalents of  $\text{LuCl}_3 \cdot 6\text{H}_2\text{O}$  (298 K,  $\text{D}_2\text{O}/\text{CD}_3\text{OD}$  2:1 v/v).

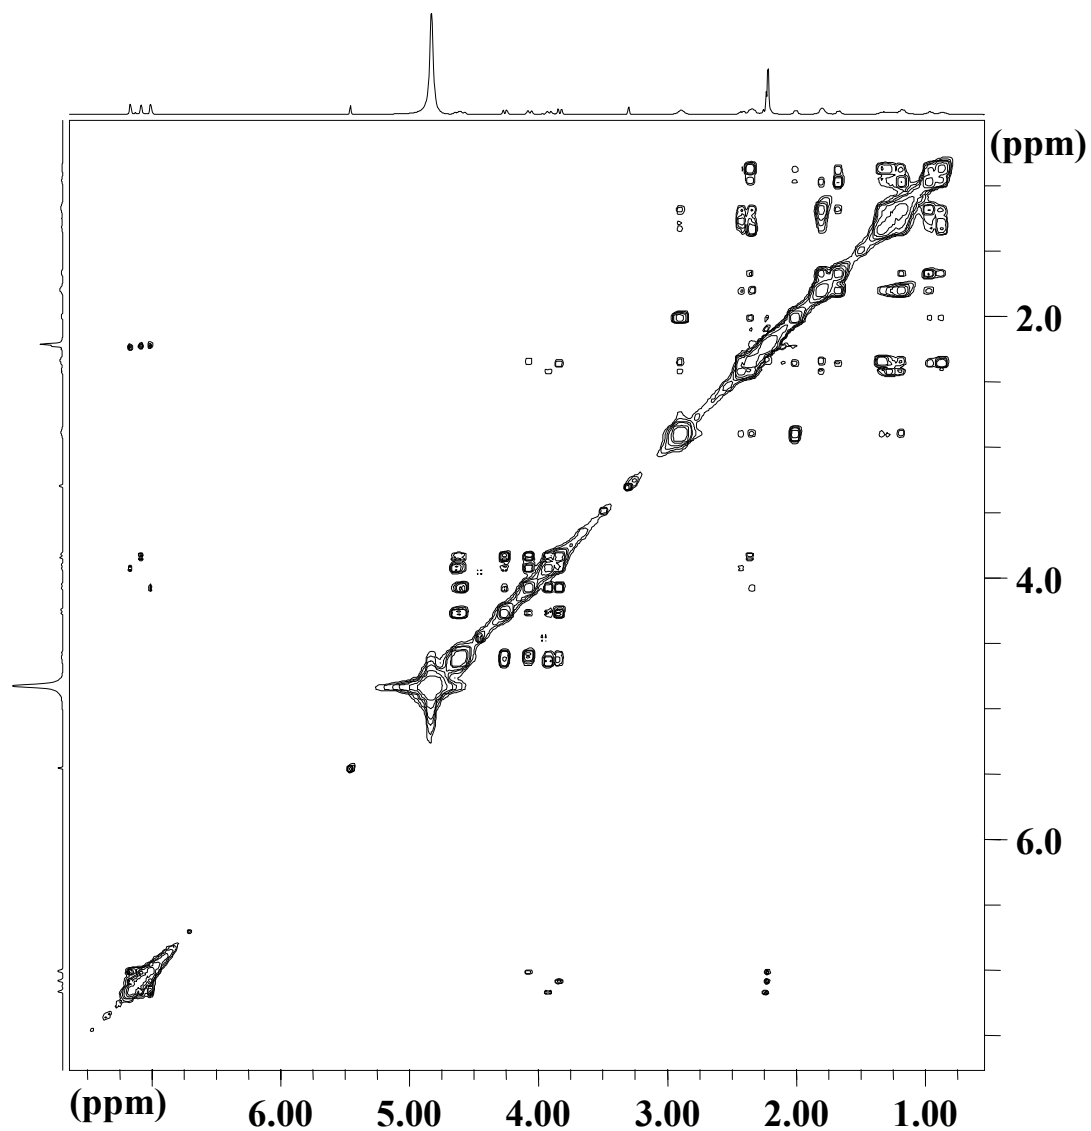

Supplementary Figure 6. NOESY spectrum (positive) of solution containing H<sub>3</sub>L and 1.9 equivalents of LuCl<sub>3</sub>·6H<sub>2</sub>O (298 K, D<sub>2</sub>O/CD<sub>3</sub>OD 2:1 v/v).

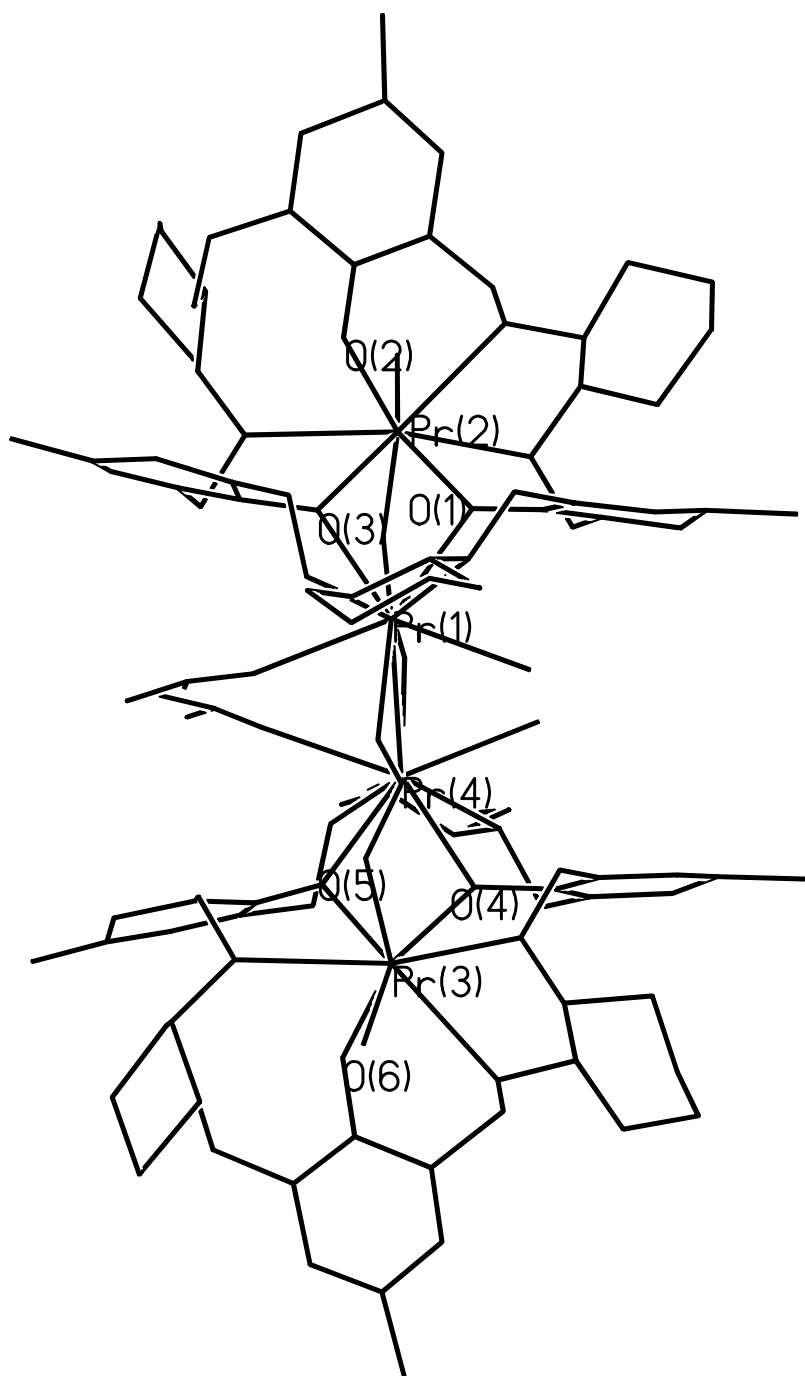

Supplementary Figure 7. View of the [Pr<sub>2</sub>L(NO<sub>3</sub>)<sub>2</sub>(OH)<sub>2</sub>]<sup>2-</sup> complex anion.



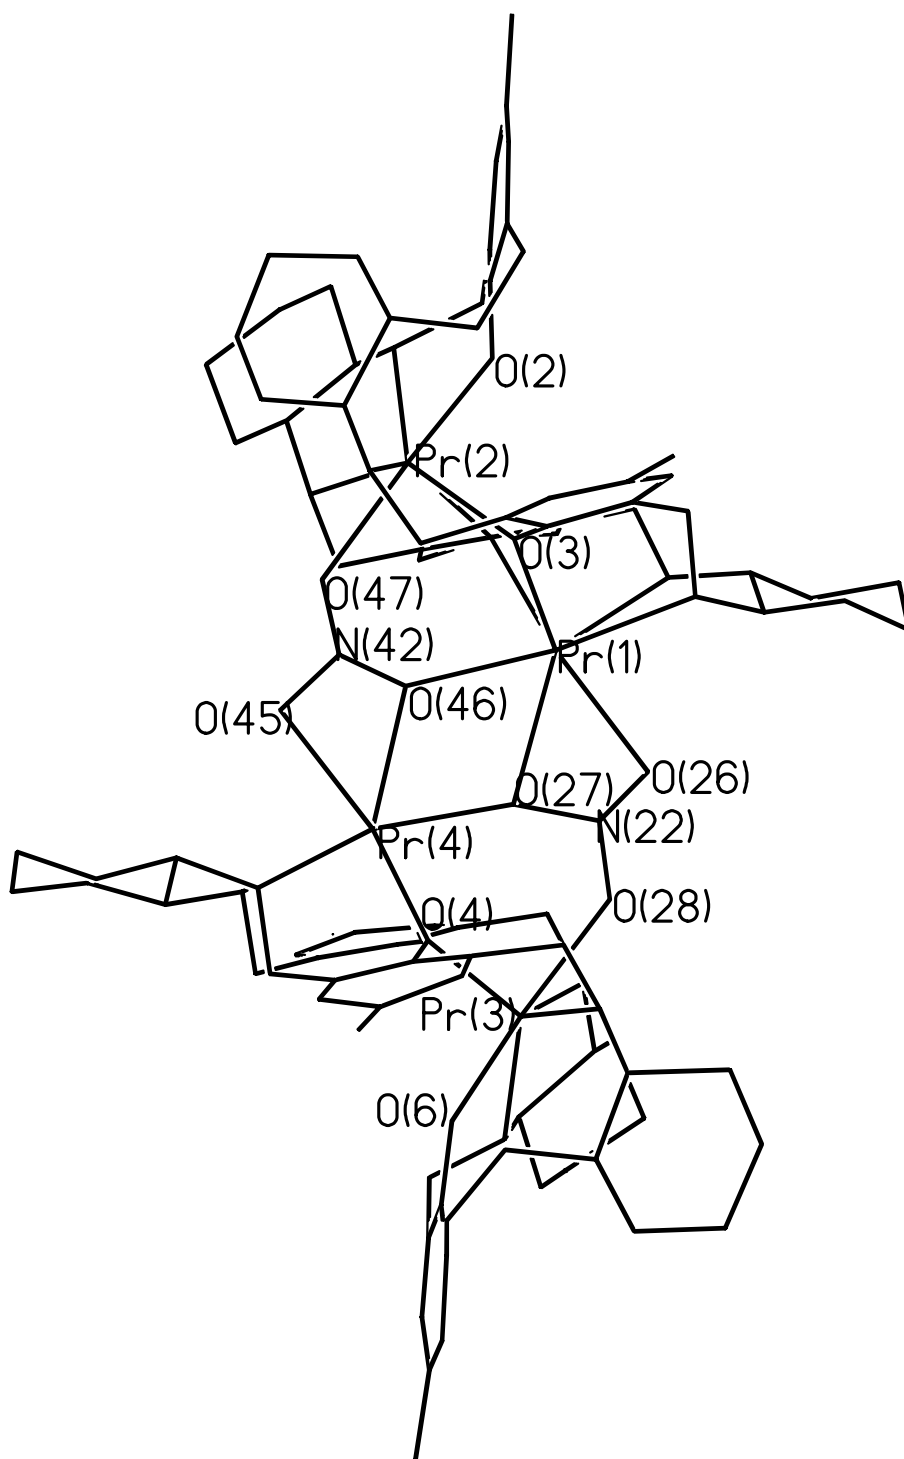

Supplementary Figure 8. Side view of the  $[\text{Pr}_2\text{L}(\text{NO}_3)_2(\text{OH})_2]^{2-}$  complex anion. Axial ligands, except bridging nitrates, are omitted.

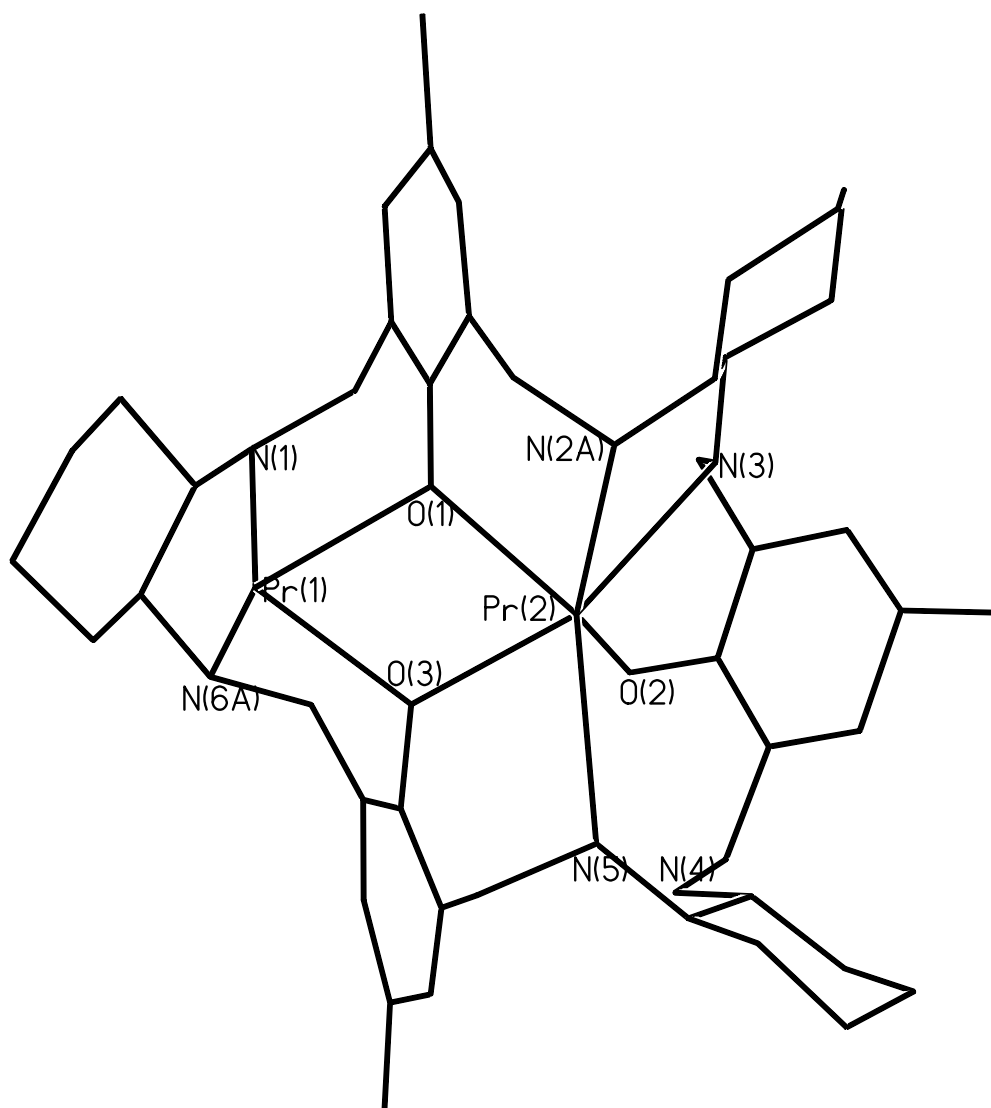

Supplementary Figure 9. View of the dinuclear macrocyclic subunit of the tetranuclear  $[\text{Pr}_2\text{L}(\text{NO}_3)_2(\text{OH})_2]^{2-}$  complex anion. Axial ligands are omitted.

**Error!**

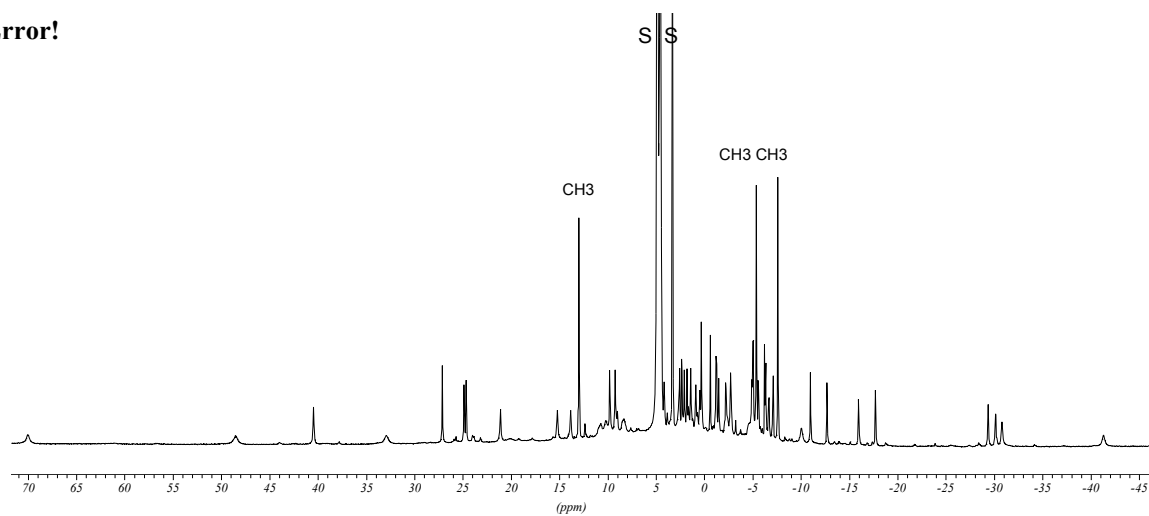

Supplementary Figure 10. <sup>1</sup>H NMR spectrum (298K) of CD<sub>3</sub>OD/ D<sub>2</sub>O (v/v 3:1) solution of Na<sub>3</sub>[Pr<sub>2</sub>L(NO<sub>3</sub>)<sub>2</sub>(OH)<sub>2</sub>]<sub>2</sub>NO<sub>3</sub>\*5H<sub>2</sub>O complex. s-solvent, CH<sub>3</sub>-methyl groups of the macrocycle.
